# Supplementary material
Source: PubMed Central journal article supplement (PMC8772520)
Supplement: NIHMS1753688-supplement-Extended_data_table_1.pdf [file NIHMS1753688-supplement-Extended_data_table_1.pdf]

Extended data table 1: **Oligonucleotides and Primers**

| <b>Name</b>                    | <b>Sequence</b>                                          |
|--------------------------------|----------------------------------------------------------|
| <i>Atrx crRNA</i>              | GAATGGCCGTAAAAGTTCTG                                     |
| <i>Blm crRNA</i>               | TTACCTGGAACATTTCAACG                                     |
| <i>Fancd2 crRNA</i>            | TGGGAAGCCTGAATTCGTGA                                     |
| <i>RnaseH1 crRNA</i>           | AGCAGGAAACCGGTCCACCT                                     |
| <i>cd4 crRNA</i>               | TATCACGGCCTATAAGAGTG                                     |
| <b>HTGTS</b>                   |                                                          |
| <i>Sp Bio Bait</i>             | 5BiosG-TAGTAAGCGAGGCTCTAAAAAGCA                          |
| <i>Sp Nested Primer</i>        | ACACTCTTTCCCTACACGACGCTCTCCGATCTGGTAAGCAAAGCTGGGCTTG     |
| <i>Bridge Adaptor Upper</i>    | GCGACTATAGGGCACGCGTGGNNNNN-NH2                           |
| <i>Bridge Adaptor Lower</i>    | 5Phospho-CCACGCGTGCCTATAGTCGC-NH2                        |
| <i>Universal I7</i>            | GACTGGAGTTCAGACGTGTGCTCTTCCGATCTGACTATAGGGCACGCGTGG      |
| <b>G4 Oligonucleotides</b>     |                                                          |
| <i>Kit1</i>                    | AAGGGAGGGCGCTGGGAGGAGGGAT                                |
| <i>Kit2</i>                    | AACGGGCGGGCGCGAGGGAGGGGAT                                |
| <i>Spb1</i>                    | AAGGCGAGGAGGGGCGTGGCCGGCAT                               |
| <i>Telo</i>                    | AATTAGGGTTAGGGTTAGGGTTAGGGAT                             |
| <i>Kit1 control</i>            | AAGCAAGCACGCTGCAAGGAGGGAT                                |
| <i>Kit2 control</i>            | AACGCACGGGCGCGAGCAAGCAGAT                                |
| <i>Spb1 control</i>            | AAGGCGACAAGGCACGTGGCCACAT                                |
| <i>Telo control</i>            | AATTAGCATTAGCATTAGCATTAGGGAT                             |
| <b>Oligos for G4 detection</b> |                                                          |
| <i>Complementary ssDNA</i>     | ATGTATCTACTCGCAGTATCATAAC3BiosG                          |
| <i>Kit1</i>                    | GATACTGCGAGTAGATACATGAAGGGAGGGCGCTGGGAGGAGGGATCT         |
| <i>Kit2</i>                    | GATACTGCGAGTAGATACATGAACGGGCGGGCGCGAGGGAGGGGATCT         |
| <i>Spb1</i>                    | GATACTGCGAGTAGATACATGAAGGCGAGGAGGGGCGTGGCCGGCATCT        |
| <i>G-default</i>               | GATACTGCGAGTAGATACATGAATGGGCAGGGCAGGGTGGGATCT            |
| <i>Kit1 control</i>            | GATACTGCGAGTAGATACATGAAG <b>CAAGCACGCTGCAAGGAGCAATCT</b> |
| <i>Kit2 control</i>            | GATACTGCGAGTAGATACATGAACG <b>CACGCACGCGAGCAAGCAGATCT</b> |
| <i>Spb1 control</i>            | GATACTGCGAGTAGATACATGAAGGCGA <b>CAAGGCACGTGGCCACATCT</b> |
| <i>G-default control</i>       | GATACTGCGAGTAGATACATGAATG <b>CACAGCACAGCATGCAATCT</b>    |
| <b>qRT-PCR Primers</b>         |                                                          |
| <i>mTet3-F</i>                 | CGAGTTCCCTACCTGCGATT                                     |
| <i>mTet3-R</i>                 | TCCTCCATGAGTTCCCGGAT                                     |
| <i>mu germline-F</i>           | CTCGGTGGCTTTGAAGGAAC                                     |
| <i>mu germline-R</i>           | TGGTGCTGGGCAGGAAGT                                       |
| <i>g1 germline-F</i>           | TCGAGAAGCCTGAGGAATGTG                                    |
| <i>g1 germline-R</i>           | ATGGAGTTAGTTTGGGCAGCA                                    |
| <i>IRF4-F</i>                  | CAATGTCCTGTGACGTTTGG                                     |
| <i>IRF4-R</i>                  | GGCTTCAGCAGACCTTATGC                                     |
| <i>c-myc-F</i>                 | TCTCCACTCACCAGCACAACTACG                                 |
| <i>c-myc-R</i>                 | ATCTGCTTCAGGACCCT                                        |
